# Supplementary material
Source: publisher figshare collection journal article supplement (https://gsajournals.figshare.com/ndownloader/files/14050508)
Supplement: Supplementary file 1 [file 14050508]

**Table S1.** Primer sequences and efficiency for proteases/proteases inhibitors uniquely misregulated in the sterile hybrid (Gomes & Civetta 2015) and two housekeeping genes.

| **Gene** | **Forward** | **Reverse** | **Efficiency** |
| --- | --- | --- | --- |
| GA13457 | CGATTGAGGGATGTGGATTC | GGTTGTCGCTGGAGATTCAT | 84% |
| GA14907 | CCTCCTCAATGGCAAAACTC | TTGTATGTCGTCTGGGCGTA | 93% |
| GA17870 | CGCTCCTACGTGTGGTACATT | CAGTTCTTCTCCTGCGGACT | 115% |
| GA18484 | ACGAACAGCACTCGATGGTA | CTCGTCGTTGCTTTGGTGAT | 116% |
| GA18944 | TTGGCTACGAGATTGCCTTT | GGAGAGGGTGGAGAAACCAT | 119% |
| GA25574 | TGGATCAGCAGGAACAGTTG | GCAATTGCCGTAGGATGTTT | 112% |
| GA30093 | TTGCAAAGCCCATAGAGGAG | CCGTGACAGTTTCCATAGGC | 100% |
| GA30092 | ATAAAGATGCGGGATGAACG | TCCTTGTTGCGGTAACTGAA | 113% |
| GA15058 | CCACGCCCAGTGAGAACTAT | GCAGGGTGTCTGAAACAGGT | 85% |
| GA24206 | AGGTGGAGCCTGTGACAGAT | CGATGTGAAGGTCTCCGAAT | 100% |
| GA15722 | GGCAACTCTGGTGGAGACAA | AGCTGCTGCACTTGACATTG | 99% |
| GA21772 | TGCCGAAGAATTGGAGAATC | AAAGAACCAGCCAAGCACAT | 93% |
| GA24796 | AATGGCGACTTCAACGTACC | CATTGCGTCCCCTTTACTGT | 109% |
| GA19543 | TCCTCCACCGCAATATAAGG | GAGGGCGATGTCGTTGTACT | 104% |
| GA20504 | CCAGAGCTTCAGCACAATGA | AAGTAGGTCGGCATCAGTGG | 105% |
| GA22690 | ACCGAATTGGTGGAGTTCAG | TTCTCACCCATACGGAGGTC | 102% |
| GA26803 | GGAGATGCCTTATTGGTGGA | ATCGGCATTTAGGGAGTGTG | 103% |
| GA27806 | GGTCAATAAGGCTGCCAAAC | GGATTTCGGCGAAGATGTTA | 116% |
| GA28780 | GTAATGCAGGAGGTGGCCTA | TTGCTCCCACACAATATCCA | 85% |
| RpL32 | CAAGTATTGGCCCTTGAAGC | GTCGGATCGTTATGCCAAGT | 100% |
| RpS18 | GGTTGGTGATGATGGTGACA | AAGAAGGCCGATGTGGATCT | 98% |

**Table S2** Mean relative expression for all genes assayed in testes (T), seminal vesicle (SV), ejaculatory bulb (EB) and accessory glands (AG). The highest significant expression mean values per gene (post-hoc Scheffe’s test, FDR corrected q< 0.05) are bolded.

|  | **T** | **SV** | **EB** | **AG** |
| --- | --- | --- | --- | --- |
| GA13457 | **-9.57** | -17.3 | **-10.55** | -18.8 |
| GA14907 | **-2.03** | -13.5 | -16.6 | -17.05 |
| GA15058 | -16.33 | -10.96 | -16.6 | **-7.73** |
| GA15722 | -2.09 | **-0.24** | **-0.5** | -4.53 |
| GA17870 | -11.59 | -9.52 | -15.13 | **-3.71** |
| GA18484 | **-8.44** | -9.38 | **-5.52** | -13.6 |
| GA18944 | -8.67 | -10.69 | -8.98 | -9.68 |
| GA19543 | **-7.44** | **-7.39** | **-7.58** | -11.31 |
| GA20504 | **-6.47** | -17.93 | -16.6 | -19.15 |
| GA21772 | **-10.28** | **-12.47** | **-13.87** | -17.79 |
| GA22690 | **-8.62** | -17.93 | -16.6 | -19.15 |
| GA24206 | **-9.18** | **-8.36** | **-11.66** | -14.46 |
| GA24796 | **-4.24** | -17.93 | -16.6 | -15.88 |
| GA25574 | **0.40** | -8.14 | -14.76 | -11.14 |
| GA26803 | -12.48 | -6.94 | -16.6 | **-1.99** |
| GA27806 | -9.90 | **-7.76** | **-6.32** | **-6.33** |
| GA28780 | **-6.23** | -10.01 | **-8.39** | -15.68 |
| GA30092 | **-0.63** | -10.31 | -13.61 | -11.97 |
| GA30093 | **-2.48** | -6.11 | -16.6 | -14.28 |
